# Supplementary material
Source: PubMed Central journal article supplement (PMC2613001)
Supplement: NIHMS72586-supplement-01.pdf [file NIHMS72586-supplement-01.pdf]

Supplemental Data

## **The Transcription Factor PLZF Directs**

### **the Effector Program of the NKT Cell Lineage**

Adam K. Savage, Michael G. Constantinides, Jin Han, Damien Picard, Emmanuel Martin, Bofeng Li, Olivier Lantz, and Albert Bendelac

#### **Supplemental Experimental Procedures**

##### **Th1 and Th2 Differentiation**

TCR $\beta^+$  CD1d- $\alpha$ GalCer tetramer-negative CD4 $^+$  splenocytes were sorted from mixed bone marrow chimeras and cultured on anti-CD3-coated (10 $\mu$ g/ml) 96-well round-bottom plates in the presence of hIL-2 (10U/ml), and Th1 (20ng/ml IL-12, 20 $\mu$ g/ml anti-IL-4) or Th2 (4ng/ml IL-4, 20 $\mu$ g/ml anti-IL-12, 20 $\mu$ g/ml anti-IFN $\gamma$ ) differentiating conditions. Cultures were split in two after 4 days and rested for 3 more days prior to restimulation by anti-CD3 coated plates for 24 hours. The cells were then assessed by intracellular flow cytometry for the presence of IL-4 and IFN $\gamma$  with Brefeldin A (10 $\mu$ g/ml) for the last 6 hours.

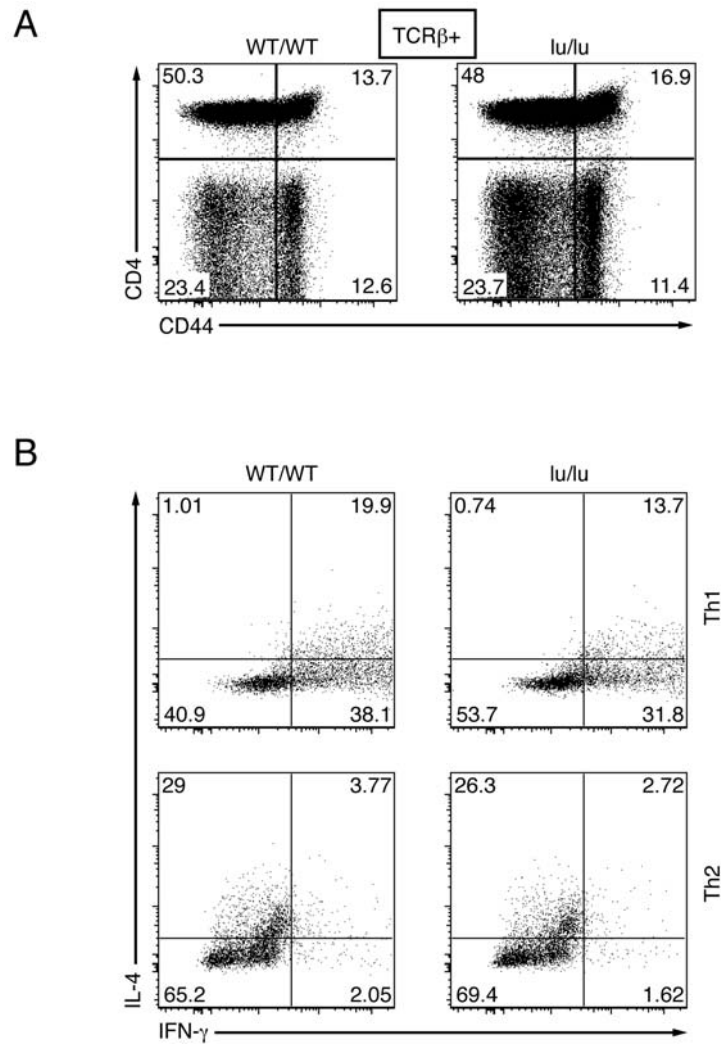

### Figure S1. Memory and Effector Cell Formation in lu/lu T Cells

(A) Wt/WT and lu/lu CD44<sup>hi</sup> memory and CD44<sup>lo</sup> naïve CD4<sup>+</sup> and CD4<sup>-</sup> T cells among TCR $\beta$ <sup>+</sup> gated splenocytes of mixed bone marrow chimeras. Data representative of 6 individual chimeras.

(B) In vitro generation of Th1 and Th2 polarized CD4 cells from fresh splenic CD4 T cells of mixed bone marrow chimeras. Dot plots show intracellular IL4 and IFN $\gamma$  in gated CD45.1 (WT) and CD45.2 (lu/lu) cells after ionomycin/PMA restimulation, as indicated. Data representative of 3 individual chimeras.
